# Supplementary material for: Genomic Knockout of Two Presumed Forelimb Tbx5 Enhancers Reveals They Are Nonessential for Limb Development
Source: PubMed Central journal article supplement — Cell Rep. Author manuscript; Available in PMC 2018 Jul 6. (PMC6034701; doi:10.1016/j.celrep.2018.05.052), 2018-06-12
Supplement: NIHMS978727-supplement-1.pdf [file NIHMS978727-supplement-1.pdf]

Cell Reports, Volume 23

## Supplemental Information

### **Genomic Knockout of Two Presumed Forelimb *Tbx5* Enhancers Reveals They Are Nonessential for Limb Development**

**Thomas J. Cunningham, Joseph J. Lancman, Marie Berenguer, P. Duc Si Dong, and Gregg Duester**

## Supplemental Figures and Legends

### Mouse *Tbx5* intron 2 gene edited allele (357 bp deletion):

KEY: **EXONS (BOLD)**  
INTRONS (NORMAL TYPE)  
N<sub>20</sub> (sgRNA) NGG (PAM)  
REPORTED: HOX BINDING SITES, RARE, Tcf/Lef (Wnt/ $\beta$ -catenin)  
**GENOTYPING PRIMERS**  
DELETED REGION (357 bp)

mm10: chr5:119836798-119838792 *Tbx5*-intron2- $\Delta$ 357

```
CTTCAGCTTGGAGTGAAGGGTCAAACAGCTTGTCCCCTATGTCGCTAGACACTCTCCAACCTCCCTCTCTTGTCTCAGAAATAGAACCTCGCGCGGGCACAGGAAC
CCCTGCGCACCATGGCCGATACAGATGAGGGCTTTGGCCCTGGCGCGCAGCCCTCTGGAGCCTGATTCCAAAGACAGGTCCTTGGGATTCGAAACCTGAGAGTGCTC
TGGGGGCTCCAGCAAGTCTCCATCATCCCCGAGGCTGCCTTCACCCAGCAGGTAAAGAAAAGCCGGCCAGCGGCAGGCGTAGACCGAGGACTGAGCCCAGCTC
TCTGCTAACGGTGCAGGGGGTGGGCAGGGCCAGCTATTCCTCTATTTCTGGCTAGTCTCACCAAATCTCCCCAATTCCTACTCTATCCCAATCCACTTTATC
GAGGCGTTTATCTTTATGGCCTCGCTATTTTAGAAACCTATTACATTATTGGAGAGCTCTCAATTATCCGACTATTTGGGGTCAGCTAACCAACGGGCCAGATAA
TTCTCTCCCAGCTGCCCTGGGTATGCCTTATTAAGGGTCCGGTTCAGCGGCCCTTCAGGCGGGCATGAGCGATGACTTGACCCTCCTTAGATCTTTCTTAGCCTT
CGCCTCGGCTCGCCTGCTCTGCGCAACCCGCTCGCCCCCTCATAACAGTACCATTTATCTTGTCTCGGGGCTGGAGGAGCTCCCTGACCCGCGGAGGAGAGCACA
CAGGGGCTGGAACCAAGGCACCCAGAGCCCGCTGACTGGAAGTTGGTCCGGAGTGGAGGGAGAGGTCTTGTGGTCTGTTATTTGAGTGGCCATCGTTTTTTGGG
GGCGCTAAGTAGGTTTAAACTAGGTGTCACTGGGAAGGCTTGACCAGAGAGATGAGTTTGATCTAGAAATCTGTCCAATGATGTGTGTATAGCTTTTTAATAA
AAGCAAAGAGGCTTAAGAATAGTTTGGGAAATTTACATAACATTTTGAAGGGGAAAACAAGTTCACTTTTTAGTCGGTGGTGGATAATGTTTACCAATGAAG
AGTAGTGTCTGACTGTTTGGTATTGGTTTTAGAAATAACTTCCAGTGGAAAGAGAAAATGTTAAAGGCTTAATTGGTTGCCCAAGTCAAAGAAAGGCTGGG
CGGTGGCTAGATAAGGCAAGAGTCTGGAAAGATTGTTAATATAGACACTGAGGGGAAAACACTTTTTTTGGTCTTGAGAAGAAAACGATTTTTAAATTTG
AAAATTTCTACATAGTGGCTCACATGTGTTGGAATCTTAGCACTTAGGAGGGTGGAGCAGGAGGGTTGCCAAGAGTTTGAGACCCTTTTATGCGCTGCATAGTG
AATTCAGGCCCTGTCTGGGCTGCAGAGCAAGACTTTGTCTCCAATATTAATAACAACAATAATATTGAAAATTTTTGTATGTTTATAGACCCAGTGTATGAC
GGACAGCGATGATTTGCATAGCTGTGTGTTTGCATCTGGGTGACAATACAAAATATCTAGTGGGGTTTTCTAGATGGATCCCTCCCAATCATGTTTCAGC
TAAAAATGGATCCAAATTAGATGGCCTGGTCTCTAGGGGGGAGCTCTGTGGAGGGGAATAATTCAGGCGCTCAATCTGGTGGAAAGAGACAGCAGGTACTAAGG
ACTGAGATGCTGCTGGACGCAAGCTCCAACCTACCTAGGGAGCTGTAGGCAGATGCCATGGGTGCGCCCTAGACTTTCCATCACTCCCAGAAGTCAGAGCGCTCT
TTCTTTAACCACAGACTTTGGTAGGTACTTGGCCTCTGCATATAGGGGGGAGTTTGAGAAAGGATTCCCCGCTAAGACCCATCACTGAAAATTTTCTCTTTGT
CTATCAAGGGCATGGAAGGAATCAAGGTGTTTCTTCATGACGTGAACTGTGGCTGAAGTTCCACGAAGTGGGCACAGAGATGATCATCCAAGGCAGGGAGGT
```

### Mouse *Tbx5* intron 2 gene edited allele (548 bp deletion):

KEY: **EXONS (BOLD)**  
INTRONS (NORMAL TYPE)  
N<sub>20</sub> (sgRNA) NGG (PAM)  
REPORTED: HOX BINDING SITES, RARE, Tcf/Lef (Wnt/ $\beta$ -catenin)  
**GENOTYPING PRIMERS**  
DELETED REGION (548 bp)

mm10: chr5:119836798-119838792 *Tbx5*-intron2- $\Delta$ 548

```
CTTCAGCTTGGAGTGAAGGGTCAAACAGCTTGTCCCCTATGTCGCTAGACACTCTCCAACCTCCCTCTCTTGTCTCAGAAATAGAACCTCGCGCGGGCACAGGAAC
CCCTGCGCACCATGGCCGATACAGATGAGGGCTTTGGCCCTGGCGCGCAGCCCTCTGGAGCCTGATTCCAAAGACAGGTCCTTGGGATTCGAAACCTGAGAGTGCTC
TGGGGGCTCCAGCAAGTCTCCATCATCCCCGAGGCTGCCTTCACCCAGCAGGTAAAGAAAAGCCGGCCAGCGGCAGGCGTAGACCGAGGACTGAGCCCAGCTC
TCTGCTAACGGTGCAGGGGGTGGGCAGGGCCAGCTATTCCTCTATTTCTGGCTAGTCTCACCAAATCTCCCCAATTCCTACTCTATCCCAATCCACTTTATC
GAGGCGTTTATCTTTATGGCCTCGCTATTTTAGAAACCTATTACATTATTGGAGAGCTCTCAATTATCCGACTATTTGGGGTCAGCTAACCAACGGGCCAGATAA
TTCTCTCCCAGCTGCCCTGGGTATGCCTTATTAAGGGTCCGGTTCAGCGGCCCTTCAGGCGGGCATGAGCGATGACTTGACCCTCCTTAGATCTTTCTTAGCCTT
CGCCTCGGCTCGCCTGCTCTGCGCAACCCGCTCGCCCCCTCATAACAGTACCATTTATCTTGTCTCGGGGCTGGAGGAGCTCCCTGACCCGCGGAGGAGAGCACA
CAGGGGCTGGAACCAAGGCACCCAGAGCCCGCTGACTGGAAGTTGGTCCGGAGTGGAGGGAGAGGTCTTGTGGTCTGTTATTTGAGTGGCCATCGTTTTTTGGG
GGCGCTAAGTAGGTTTAAACTAGGTGTCACTGGGAAGGCTTGACCAGAGAGATGAGTTTGATCTAGAAATCTGTCCAATGATGTGTGTATAGCTTTTTAATAA
AAGCAAAGAGGCTTAAGAATAGTTTGGGAAATTTACATAACATTTTGAAGGGGAAAACAAGTTCACTTTTTAGTCGGTGGTGGATAATGTTTACCAATGAAG
AGTAGTGTCTGACTGTTTGGTATTGGTTTTAGAAATAACTTCCAGTGGAAAGAGAAAATGTTAAAGGCTTAATTGGTTGCCCAAGTCAAAGAAAGGCTGGG
CGGTGGTCTAGATAAGGCAAGAGTCTGGAAAGATTGTTAATATAGACACTGAGGGGAAAACACTTTTTTTGGTCTTGAGAAGAAAACGATTTTTAAATTTG
AAAATTTCTACATAGTGGCTCACATGTGTTGGAATCTTAGCACTTAGGAGGGTGGAGCAGGAGGGTTGCCAAGAGTTTGAGACCCTTTTATGCGCTGCATAGTG
AATTCAGGCCCTGTCTGGGCTGCAGAGCAAGACTTTGTCTCCAATATTAATAACAACAATAATATTGAAAATTTTTGTATGTTTATAGACCCAGTGTATGAC
GGACAGCGATGATTTGCATAGCTGTGTGTTTGCATCTGGGTGACAATACAAAATATCTAGTGGGGTTTTCTAGATGGATCCCTCCCAATCATGTTTCAGC
TAAAAATGGATCCAAATTAGATGGCCTGGTCTCTAGGGGGGAGCTCTGTGGAGGGGAATAATTCAGGCGCTCAATCTGGTGGAAAGAGACAGCAGGTACTAAGG
ACTGAGATGCTGCTGGACGCAAGCTCCAACCTACCTAGGGAGCTGTAGGCAGATGCCATGGGTGCGCCCTAGACTTTCCATCACTCCCAGAAGTCAGAGCGCTCT
TTCTTTAACCACAGACTTTGGTAGGTACTTGGCCTCTGCATATAGGGGGGAGTTTGAGAAAGGATTCCCCGCTAAGACCCATCACTGAAAATTTTCTCTTTGT
CTATCAAGGGCATGGAAGGAATCAAGGTGTTTCTTCATGACGTGAACTGTGGCTGAAGTTCCACGAAGTGGGCACAGAGATGATCATCCAAGGCAGGGAGGT
```

**Figure S1. CRISPR/Cas9 gene editing of mouse *Tbx5* intron 2 element. Related to Figure 1.** Shown is the DNA sequence in the vicinity of the mouse *Tbx5* intron 2 DNA element conserved in mammals (Minguillon et al., 2012). Within the intron 2 DNA element are shown regions that were reported to bind HOX4 or HOX5 proteins (orange), a retinoic acid response element (red), and a Tcf/Lef (Wnt/ $\beta$ -catenin) element (green) (Minguillon et al., 2012; Nishimoto et al., 2014; Nishimoto et al., 2015). The locations of sgRNAs used for CRISPR/Cas9 gene editing are shown, resulting in mice carrying the deletions shown by gray shading.



## Zebrafish *tbx5a* cns12sh DNA element gene edited allele (248 bp deletion):

KEY: NON-CODING (all)

N<sub>20</sub> (sgRNA) NGG (PAM)

CNS12sh DNA element

GENOTYPING PRIMERS

DELETED REGION (248 bp)

```
CCTCAGACAAATCCAAGCGTGGCGGCAGGATAAGGCCATGGAAAGATCTCTTTTATCTCCTCGGCACTTTTGCCTTTTG
TTGATGATACACTGACCTTCTCATCGATCTCCAGCTCTAAGCTCCTGTGCGCTCTGATAATGAGACTCCGCTGATAATG
AGGAAAATAATTGTCCCGGCGGTGTGTTGTGGCTGTCCGGCGGCATCTGACCCGCATTGTCTGCACACATCTTGATTI
CATTAACTCTCTTCTTCTACTGGCTGTCAAAAGACTCTTGTCTGCTGGAGTGATCCACCATGACTGTCTAGTGGC
CTTCTAAAGGGGATCTACTATGCAGGAACCGCTTTATAAGGGGTGGCATGGTGGCGCAGTGGGTAGCACAATCATCT
TACAGCGAGAAGGTCACCCCGGCTGGTTCAGGTGACATTCTGTGTGGAGTTGCATGTTCTCCTAGTGTTGTCATGG
GTTTCTCCATCAAAAAACATGTGGTATAGGGGAATTGGGTAAGCTAAATTGTTGGTAGTGTGTATGGATGTTTCCAG
TGATGGGTTGCAGCTGGAAGGGCATTGCTGCATTGAAAAATATGCTGGATAAGTTGGCGGTTTATTCCACTGTGGA
AACCCAGATTAATAAAGGAACTAAGCTGAAAATTAATGAATGAATGATCAGACTTGATGAATGAAACACTTTGCTTGA
CATTCCCTCTTGAACGTGCCACGCCAACACGAGGAGAACATGCAAACCCACAGAAACACCAAATGACCCAGCCGGG
ACTCAAACCAGCAACCTTCTGTGTGAGGTGATCGTGCTACCCACTGCACCACCGTGACGCTTTCACGAGATGTTTTI
CAACCGAAAACTTTGTTTACA
```

**Figure S3. CRISPR/Cas9 gene editing of zebrafish *tbx5a* DNA element. Related to Figure 4.** Shown is the DNA sequence in the vicinity of the zebrafish cns12sh DNA element located ~30 kb downstream of the *tbx5a* coding region, showing a 248 bp region deleted using CRISPR/Cas9 gene editing. Bold sequence refers to the region highly conserved in jawed vertebrates (Adachi et al., 2016).

## Supplemental References

- Adachi, N., Robinson, M., Goolsbee, A., and Shubin, N.H. (2016). Regulatory evolution of Tbx5 and the origin of paired appendages. *Proc Natl Acad Sci USA* *113*, 10115-10120.
- Minguillon, C., Nishimoto, S., Wood, S., Vendrell, E., Gibson-Brown, J.J., and Logan, M.P. (2012). Hox genes regulate the onset of Tbx5 expression in the forelimb. *Development* *139*, 3180-3188.
- Nishimoto, S., Minguillon, C., Wood, S., and Logan, M.P. (2014). A combination of activation and repression by a colinear Hox code controls forelimb-restricted expression of Tbx5 and reveals Hox protein specificity. *PLoS Genetics* *10*, e1004245.
- Nishimoto, S., Wilde, S.M., Wood, S., and Logan, M.P. (2015). RA Acts in a Coherent Feed-Forward Mechanism with Tbx5 to Control Limb Bud Induction and Initiation. *Cell Reports* *12*, 879-891.
