# Supplementary material for: Genomic Knockout of Two Presumed Forelimb Tbx5 Enhancers Reveals They Are Nonessential for Limb Development
Source: PubMed Central journal article supplement — Cell Rep. Author manuscript; Available in PMC 2018 Jul 6. (PMC6034701; doi:10.1016/j.celrep.2018.05.052), 2018-06-12
Supplement: NIHMS978727-supplement-2.pdf [file NIHMS978727-supplement-2.pdf]

## Genomic Knockout of Two Presumed Forelimb *Tbx5* Enhancers Reveals They Are Nonessential for Limb Development

### Graphical Abstract

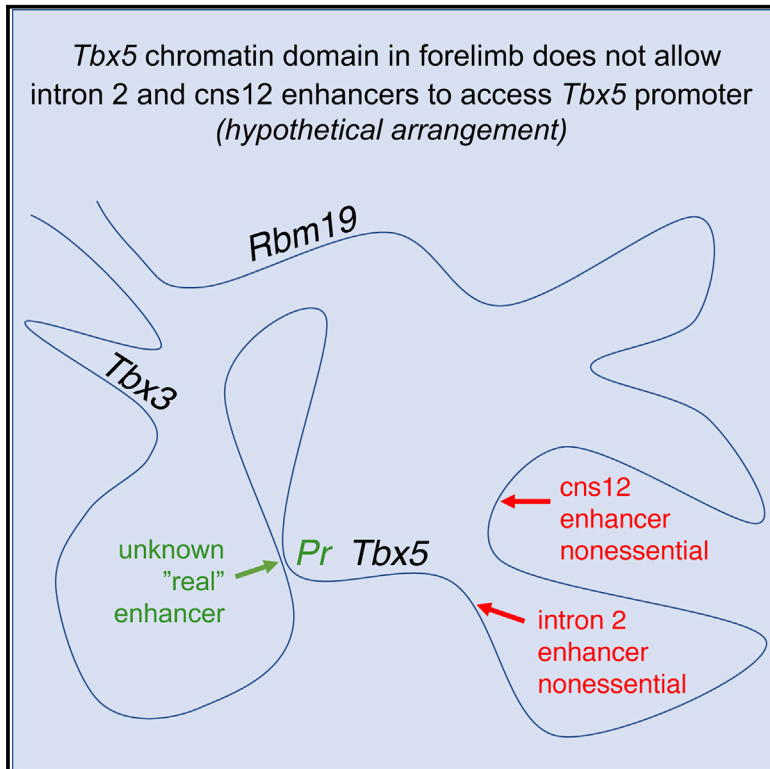

### Authors

Thomas J. Cunningham,  
Joseph J. Lancman, Marie Berenguer,  
P. Duc Si Dong, Gregg Duester

### Correspondence

duester@sbpdiscovery.org

### In Brief

Forelimb development requires *Tbx5*. Using CRISPR/Cas9 gene editing to create homozygous deletions, Cunningham et al. show that two *Tbx5* forelimb enhancers identified with reporter transgenes are not required for *Tbx5* activation or forelimb development. These observations demonstrate that knockout studies are required to identify endogenous enhancers necessary for biological processes.

### Highlights

- Putative *Tbx5* forelimb enhancers were deleted in mouse and zebrafish using CRISPR/Cas9
- Double knockouts of the two enhancers show both are nonessential and nonredundant
- A retinoic acid response element in one enhancer is nonessential for forelimb growth
- Knockout studies are needed to infer necessity of proposed transcriptional enhancers

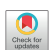

# Genomic Knockout of Two Presumed Forelimb *Tbx5* Enhancers Reveals They Are Nonessential for Limb Development

Thomas J. Cunningham,<sup>1</sup> Joseph J. Lancman,<sup>2</sup> Marie Berenguer,<sup>1</sup> P. Duc Si Dong,<sup>2</sup> and Gregg Duester<sup>1,3,\*</sup>

<sup>1</sup>Development, Aging and Regeneration Program, Sanford Burnham Prebys Medical Discovery Institute, La Jolla, CA 92037, USA

<sup>2</sup>Human Genetics Program, Sanford Burnham Prebys Medical Discovery Institute, La Jolla, CA 92037, USA

<sup>3</sup>Lead Contact

\*Correspondence: [duester@sbpdiscovery.org](mailto:duester@sbpdiscovery.org)

<https://doi.org/10.1016/j.celrep.2018.05.052>

## SUMMARY

A standard approach in the identification of transcriptional enhancers is the use of transgenic animals carrying DNA elements joined to reporter genes inserted randomly in the genome. We examined elements near *Tbx5*, a gene required for forelimb development in humans and other vertebrates. Previous transgenic studies reported a mammalian *Tbx5* forelimb enhancer located in intron 2 containing a putative retinoic acid response element and a zebrafish *tbx5a* forelimb (pectoral fin) enhancer located downstream that is conserved from fish to mammals. We used CRISPR/Cas9 gene editing to knockout the endogenous elements and unexpectedly found that deletion of the intron 2 and downstream elements, either singly or together in double knockouts, resulted in no effect on forelimb development. Our findings show that reporter transgenes may not identify endogenous enhancers and that *in vivo* genetic loss-of-function studies are required, such as CRISPR/Cas9, which is similar in effort to production of animals carrying reporter transgenes.

## INTRODUCTION

An accurate understanding of gene regulation requires identification of DNA control elements that function as transcriptional enhancers *in vivo* (Smith and Shilatifard, 2014). A common technique in enhancer identification is the production of transgenic reporter animals that carry putative DNA control elements joined to reporter genes that are randomly inserted in the genome (Andrey and Mundlos, 2017; Catarino and Stark, 2018). Here, we examined putative enhancers for *Tbx5*, a gene mutated in some humans suffering from forelimb and heart developmental defects (Bruneau et al., 2001).

During forelimb development, mouse *Tbx5* and its zebrafish homolog *tbx5a* are both expressed in the early forelimb field, where they are required for initiation of forelimb outgrowth, i.e., arms in mouse and pectoral fins in zebrafish; genetic loss-of-function results in complete absence of forelimbs or pectoral fins (Ahn et al., 2002; Agarwal et al., 2003; Rallis et al., 2003).

Transgenic mouse studies identified a DNA element lying within intron 2 of mouse *Tbx5* that conferred transgene expression specifically in the forelimb field (Minguillon et al., 2012). A minimal element needed for transgene expression was reported to contain six HOX-binding sites in a 361-bp region, with four additional HOX-binding sites located close upstream (Figure 1), supporting the hypothesis that *Hox4* and *Hox5* genes known to be expressed in the forelimb field may function to activate *Tbx5* in this location (Minguillon et al., 2012; Nishimoto et al., 2014). Further studies on the minimal 361-bp DNA element reported that it also contains a Tcf/Lef (Wnt/ $\beta$ -catenin) binding site and a retinoic acid response element (RARE) (Nishimoto et al., 2015). The report of a Tcf/Lef (Wnt/ $\beta$ -catenin) binding site was supported by  $\beta$ -catenin conditional knockout studies showing partial loss of forelimb *Tbx5* expression (Nishimoto et al., 2015). However, the suggestion that a RARE may be required for forelimb *Tbx5* activation (Nishimoto et al., 2015) is in contradiction to mouse and zebrafish RA genetic loss-of-function studies showing that RA is not directly required to activate *Tbx5* in the forelimb field but that RA is required to repress *Fgf8* in the forelimb field in order to permit forelimb *Tbx5* activation by an unknown activator (Cunningham et al., 2013).

Whereas the intron 2 *Tbx5* enhancer is conserved only in mammals (Minguillon et al., 2012), transgenic reporter studies in zebrafish described a *tbx5a* forelimb (pectoral fin) enhancer (cns12sh) located downstream that is conserved from fish to mammals (Adachi et al., 2016). Transgenic zebrafish carrying either the zebrafish cns12sh sequence or the conserved mouse cns12sh sequence were able to drive gene expression in the zebrafish pectoral fin field, demonstrating conservation of cns12sh activity in the forelimb (Adachi et al., 2016). The *Tbx5* cns12sh enhancer was not analyzed to identify any potential DNA-binding transcription factors, and its sequence is not similar to the *Tbx5* intron 2 enhancer.

Further studies were performed here to determine whether either of these elements is required for activation of the endogenous *Tbx5* or *tbx5a* genes in the forelimb fields of mouse or zebrafish, respectively.

## RESULTS

In order to further examine the potential functions of the intron 2 and cns12sh *Tbx5* forelimb enhancers, including a putative

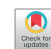

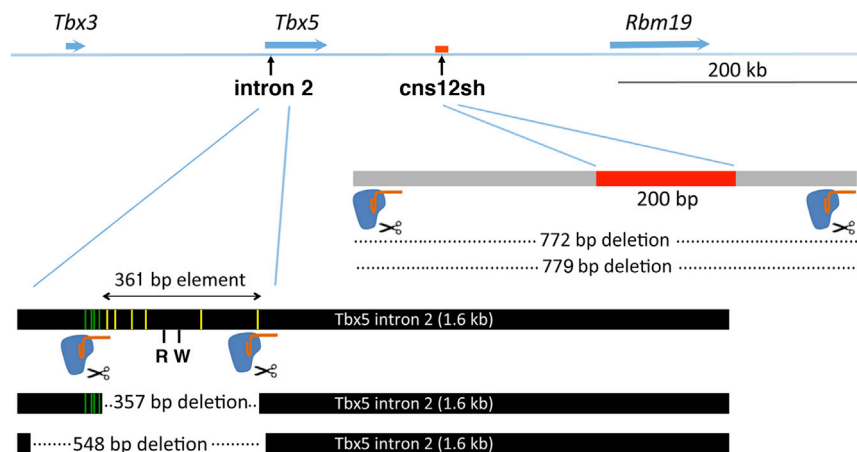

**Figure 1. Strategy for Knockout of Putative Mouse Forelimb *Tbx5* Enhancer**

CRISPR/Cas9 gene editing was used to delete the *Tbx5* intron 2 DNA element (Minguillon et al., 2012) and the downstream *cns12sh* element (Adachi et al., 2016) using two sgRNAs flanking each element. Yellow and green bars within the intron 2 element designate reported HOX-binding sites within and upstream of the minimal 361-bp sequence (Minguillon et al., 2012; Nishimoto et al., 2014). Additional reported control elements include a RARE (R) and a Tcf/Lef Wnt/ $\beta$ -catenin control element (W) (Nishimoto et al., 2015). See also Figures S1 and S2.

RARE, we first performed CRISPR/Cas9 gene editing to delete the endogenous elements in mouse (Figure 1). With regard to the *Tbx5* forelimb enhancer reported to reside inside intron 2, we obtained one deletion mutant that removed 357 bp, including most of the conserved 361-bp element, and another deletion mutant that removed 548 bp, including the entire conserved 361-bp element plus the four additional upstream HOX-binding regions (Figure S1). Mouse lines homozygous for each deletion produced offspring that were healthy and reproductive. For each homozygous deletion, E9.5 embryos exhibited normal expression of *Tbx5* in the forelimb field and normally sized forelimb buds (357-bp deletion,  $n = 12$ ; 548-bp deletion,  $n = 10$ ) (Figures 2A and 2B). Examination of embryos at embryonic day 14.5 (E14.5) showed that both homozygous deletion mutants exhibited normal forelimb skeleton formation (357-bp deletion,  $n = 7$ ; 548-bp deletion,  $n = 10$ ) (Figure 2C). Thus, loss of the *Tbx5* intron 2 DNA element had no effect on forelimb *Tbx5* expression, forelimb initiation, or forelimb development. Our results suggest that the HOX-binding sites, RARE, and Tcf/Lef Wnt/ $\beta$ -catenin elements that reside in the intron 2 element are not required for forelimb *Tbx5* activation.

As our studies show that the mouse *Tbx5* intron 2 DNA element is not required for forelimb development, another DNA element must be required. The *Tbx5* intron 2 DNA element is conserved only in mammals (Minguillon et al., 2012); however, other studies performed in zebrafish discovered a ~200-bp DNA element called *cns12sh* located ~30 kb downstream of *tbx5a* that confers forelimb-specific expression using zebrafish transgenic enhancer analysis; sequence alignment showed *cns12sh* is conserved from jawed fishes to mammals, including humans (Adachi et al., 2016). No evidence was presented for putative transcriptional regulatory proteins that may bind the *cns12sh* element. In mouse, the *cns12sh* element is located ~100 kb downstream of *Tbx5* in a 200-bp region (Figure 1). Using CRISPR/Cas9 gene editing, we generated a mouse line carrying a homozygous 779-bp deletion, including the conserved *cns12sh* element (Figures 1 and S2). Mice carrying the 779-bp deletion were used to generate homozygous deletion embryos (*cns12* KO), which exhibited normal forelimb

expression of *Tbx5* and normal forelimb initiation at E9.5 ( $n = 10$ ), plus normal forelimb skeleton formation at E14.5 ( $n = 4$ ), similar to the intron 2 element homozygous deletion (*in2* KO) (Figures 3A and 3B). Thus, like the intron 2 element, the *cns12sh* element is not required for mouse forelimb development.

In order to determine whether the *Tbx5* intron 2 and downstream *cns12sh* elements may function redundantly, we generated double mutants. As these elements are located relatively close together on the same chromosome, we used an iterative approach. Fertilized oocytes derived from animals carrying the 548-bp deletion within intron 2 were used for a second round of CRISPR/Cas9 gene editing for the *cns12sh* element, which resulted in generation of a 772-bp deletion, including *cns12sh*, very similar to the location of the 779-bp deletion in the single mutant (Figures 1 and S2). Surprisingly, embryos carrying homozygous deletions of both the intron 2 and *cns12sh* elements (double knockout [dKO]) exhibited normal forelimb expression of *Tbx5* and normal forelimb initiation at E9.5 ( $n = 7$ ), as well as normal forelimb skeleton formation at E14.5 ( $n = 5$ ) (Figures 3A and 3B). A comparison of forelimb *Tbx5* expression and skeletal element lengths in the single and double knockouts shows no significant difference with wild-type (Figure 3C). These results demonstrate that the intron 2 and *cns12sh* elements do not exhibit a redundant function with each other that is required for activation of *Tbx5* expression in the mouse forelimb.

As the *cns12sh* element was originally reported to be a forelimb *tbx5a* enhancer in transgenic zebrafish (Adachi et al., 2016), we wondered whether this element may have a function in initiation of zebrafish pectoral fin outgrowth that was lost during later evolution of mammals. We generated a line of zebrafish carrying a 248-bp deletion, including the conserved *cns12sh* element (Figures 4A and S3). From matings of heterozygous deletion mutant parents, we obtained zebrafish offspring homozygous for the 248-bp *cns12sh* deletion that all exhibited normal pectoral fins; (first mating offspring: wild-type [WT]  $n = 4$ , +/-  $n = 18$ , -/-  $n = 6$ ; second mating offspring: WT  $n = 7$ , +/-  $n = 11$ , -/-  $n = 6$ ) (Figure 4B). A comparison of pectoral fin length shows no significant difference between the *cns12sh* knockout and wild-type (Figure 4C). These findings demonstrate that the *cns12sh*

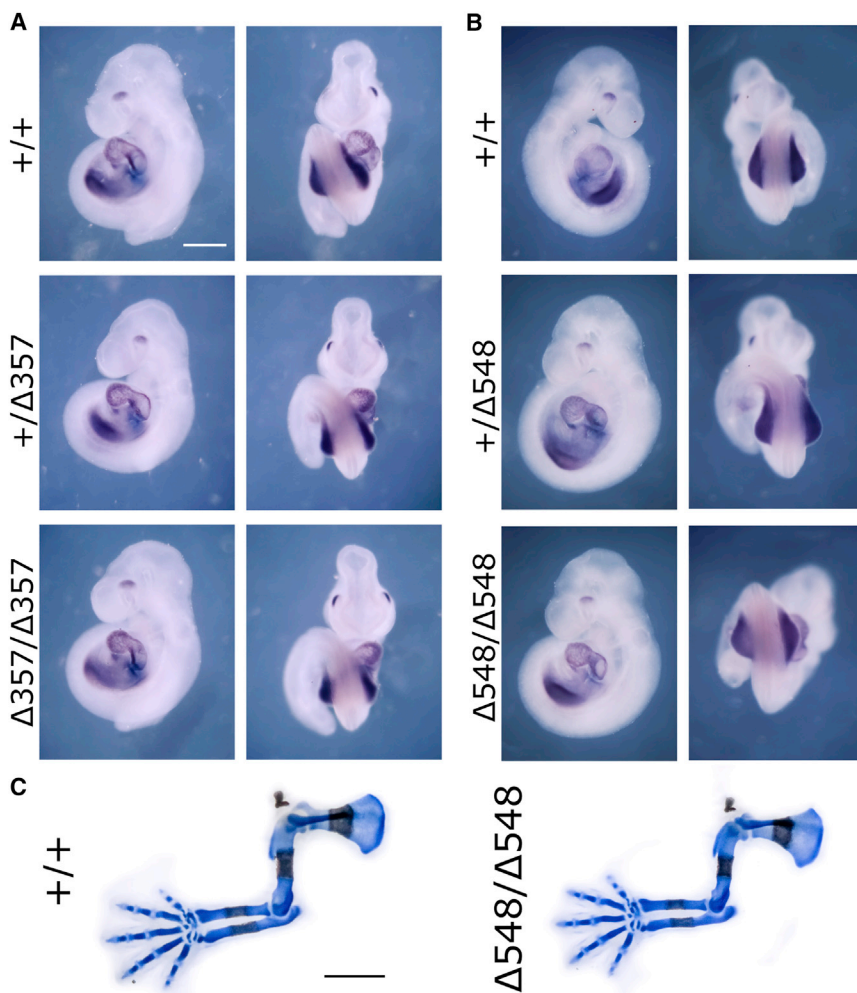

**Figure 2. Analysis of Mice Carrying Deletions of the *Tbx5* Intron 2 DNA Element**

(A and B) Expression of *Tbx5* in E9.5 wild-type (+/+) embryos compared to embryos carrying either a 357-bp deletion ( $\Delta 357$ ) (A) or a 548-bp deletion ( $\Delta 548$ ) (B) that eliminates the putative *Tbx5* forelimb enhancer within intron 2; scale bar: 0.3 mm (same for all panels).

(C) Skeletal staining of E14.5 deletion mutants compared to wild-type; scale bar: 1 mm (same for all panels). See Figure 3 for quantification.

knocking out the endogenous DNA element in its normal location or knocking it out along with one or more additional DNA elements in the case of enhancer redundancy.

Here, we were unable to build upon four previously published transgene studies on two presumed *Tbx5* enhancers independently identified in two vertebrate animals (Minguillon et al., 2012; Nishimoto et al., 2014, 2015; Adachi et al., 2016). Instead, our findings indicate that at least one other unknown DNA element must be required for activation of forelimb *Tbx5* in both mouse and zebrafish. In addition, our mouse double knockout studies show that the intron 2 and *cns12sh* elements do not share redundant or additive functions for forelimb development with each other, i.e., not even a partial effect on *Tbx5* expression that is enough to effect forelimb development in the dou-

ble knockout; in contrast, the *Tbx5* knockout results in complete loss of forelimbs (Ahn et al., 2002; Agarwal et al., 2003; Rallis et al., 2003). It may be possible that one or both of these DNA elements share a redundant function with an unknown third DNA element. However, recent enhancer knockout studies by others demonstrated that, when two or more endogenous DNA elements exhibit redundancy for gene activation *in vivo*, they typically function additively instead of completely redundantly (Will et al., 2017; Catarino and Stark, 2018; Dickel et al., 2018; Osterwalder et al., 2018). Thus, as we see no effect on *Tbx5* expression when both of the *Tbx5* DNA elements are deleted, it is possible that neither of these DNA elements are required for activation of *Tbx5* or initial forelimb outgrowth, i.e., they may not share a redundant function with an unknown third DNA element that is yet to be discovered. We suggest that, even though the intron 2 and *cns12sh* elements can activate transcription when placed near basal promoters in ectopic genomic locations, in their normal genomic locations they may not be properly positioned within their topologically associated domain (TAD) to control forelimb *Tbx5* activation. Thus, the *Tbx5* DNA elements we examined may be vestigial enhancers or

## DISCUSSION

For more than 30 years, numerous transgenic animal studies have been used to provide *in vivo* evidence for DNA elements that function as transcriptional enhancers. Identification of presumed enhancers in transgenic animals is considered highly superior to analysis of enhancers in cell lines; however, this technique involves ligation of a DNA element to a reporter gene and random insertion in the genome far from its normal location. With the CRISPR/Cas9 single and double knockout studies presented here, we show that one cannot rely only on reporter transgenes to identify enhancers that are biologically necessary. Our findings suggest that DNA regulatory elements that are closely linked to a basal promoter and randomly inserted into the genome may exhibit enhancer functions that do not exist in their normal location, often far from the nearest promoter. Thus, although reporter transgenes can identify potential enhancers, identification of a true enhancer that is necessary for gene regulation requires the observation of a defect after

element is not required for initiation of zebrafish pectoral fin outgrowth.



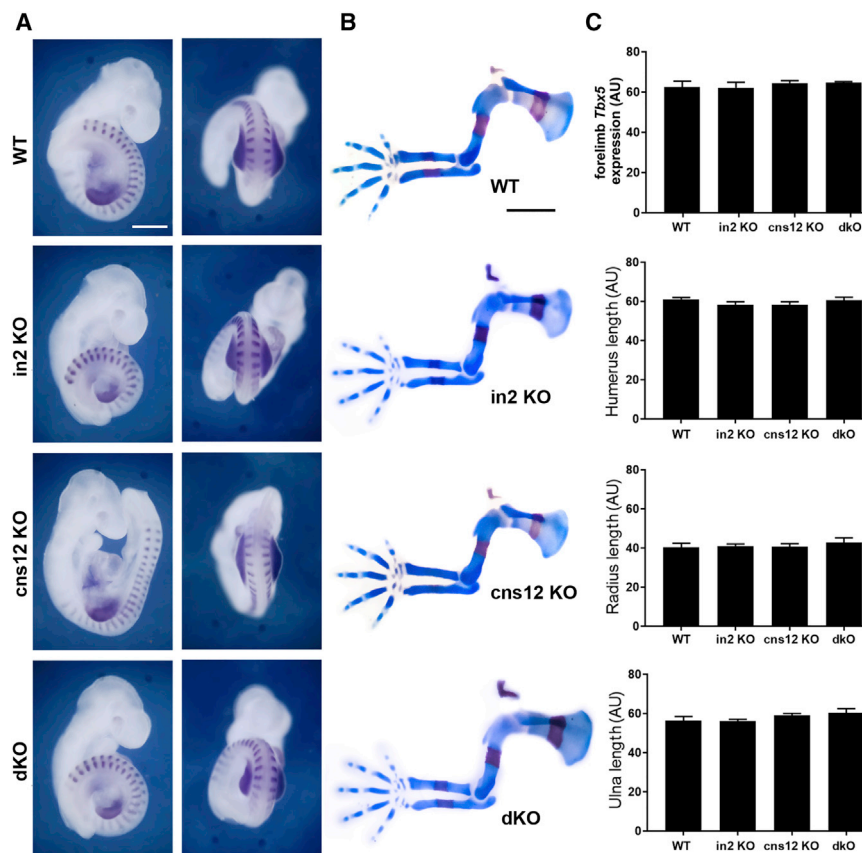

**Figure 3. Analysis of Mice Carrying Deletions of the *Tbx5* *cns12sh* Element or Both Intron 2 and *cns12sh* Elements**

(A) Expression of both *Tbx5* and *Uncx* (somites) in E9.5 embryos carrying homozygous deletions of putative *Tbx5* forelimb enhancers; *cns12* KO, *cns12* element 779-bp deletion; dkO, double KO containing intron 2 element 548-bp deletion and *cns12* element 772-bp deletion; in2 KO, intron 2 element 548-bp deletion; WT, wild-type; scale bar: 0.3 mm (same for all panels).

(B) Skeletal staining of E14.5 homozygous deletion mutants compared to WT; scale bar: 1 mm (same for all panels).

(C) Comparison of forelimb *Tbx5* expression in stage-matched E9.5 embryos (24 or 25 somites detected by *Uncx* expression) and forelimb skeletal element lengths (humerus, radius, and ulna) at E14.5 across the indicated genotypes; data are expressed as mean  $\pm$  SD. For all comparisons,  $p > 0.05$  (not significant difference) using one-way ANOVA non-parametric test ( $n = 3$  biological replicates for each genotype, stage-matched).

previous studies demonstrating that RA is not directly required for *Tbx5* activation in zebrafish or mouse but instead that RA is required for repression of *Fgf8* to permit activation of *Tbx5* by some other mechanism in both zebrafish and mouse (Cunningham et al., 2013).

Our knockout studies also demonstrate

pseudoenhancers, i.e., enhancers that once had a required function in forelimb activation that has been lost during evolution. Further knockout studies on another potential forelimb *Tbx5* enhancer are needed to resolve this issue. Additional enhancer candidates may be obtained by analyzing the *Tbx5* genomic landscape during forelimb initiation using chromatin conformation capture and other chromatin profiling techniques. One such study that included an analysis of H3K27ac marks near mouse *Tbx5* estimated it may be regulated by at least four enhancers in developing limbs at E11.5 (Osterwalder et al., 2018); we observed that the intron 2 enhancer is included within a very large region marked by H3K27ac, whereas the *cns12sh* enhancer is not marked by H3K27ac; however, analysis at E11.5 may be too late to make conclusions on potential enhancers, as *Tbx5* is activated at E8.5 in mouse (Agarwal et al., 2003).

Our observations indicate that enhancer reporter transgene findings need to be validated by enhancer knockout studies before concluding that factors binding the enhancer are required for gene regulation. Importantly, as the RARE reported to exist in the mouse *Tbx5* intron 2 enhancer (Nishimoto et al., 2015) was deleted in our studies without any effect on forelimb *Tbx5* expression, the RARE enhancer data can no longer be used to support a role for RA receptors and RA in activation of *Tbx5* in the forelimb. Our observation of no effect on forelimb *Tbx5* expression following loss of the RARE is consistent with

that the Hox binding and *Tcf/Lef* (Wnt/ $\beta$ -catenin) binding sites previously reported in the *Tbx5* intron 2 DNA element (Minguillon et al., 2012; Nishimoto et al., 2014, 2015) are not required for *Tbx5* forelimb activation.

Several RAREs have been previously studied *in vivo* using reporter transgenes, but only a few have been subjected to genetic loss of function to determine whether they are required for regulation of a nearby gene (Cunningham and Duester, 2015). Traditional knockout studies using embryonic stem cells identified RAREs that are required to activate *Cdx1* (Houle et al., 2003) and *Hoxa1* (Dupé et al., 1997). Recent CRISPR/Cas9 gene editing was used to identify a silencer RARE that is required for RA repression of *Fgf8* (Kumar et al., 2016). In the future, we recommend that *in vivo* knockout analyses be performed before concluding that a DNA element is required as a RARE.

Our double knockout studies provide a compelling case for moving to reliance on genetic disruption of endogenous noncoding DNA elements to provide a definitive answer on whether a DNA element is required for gene regulation. Reporter transgenes can identify candidate enhancers, but verification of function by knockout is necessary to move the field forward in a positive direction. A CRISPR/Cas9 knockout approach requires about the same time, effort, and cost compared to the traditional strategy of generating mice or zebrafish carrying transgenic reporters, and CRISPR facilitates the ability to

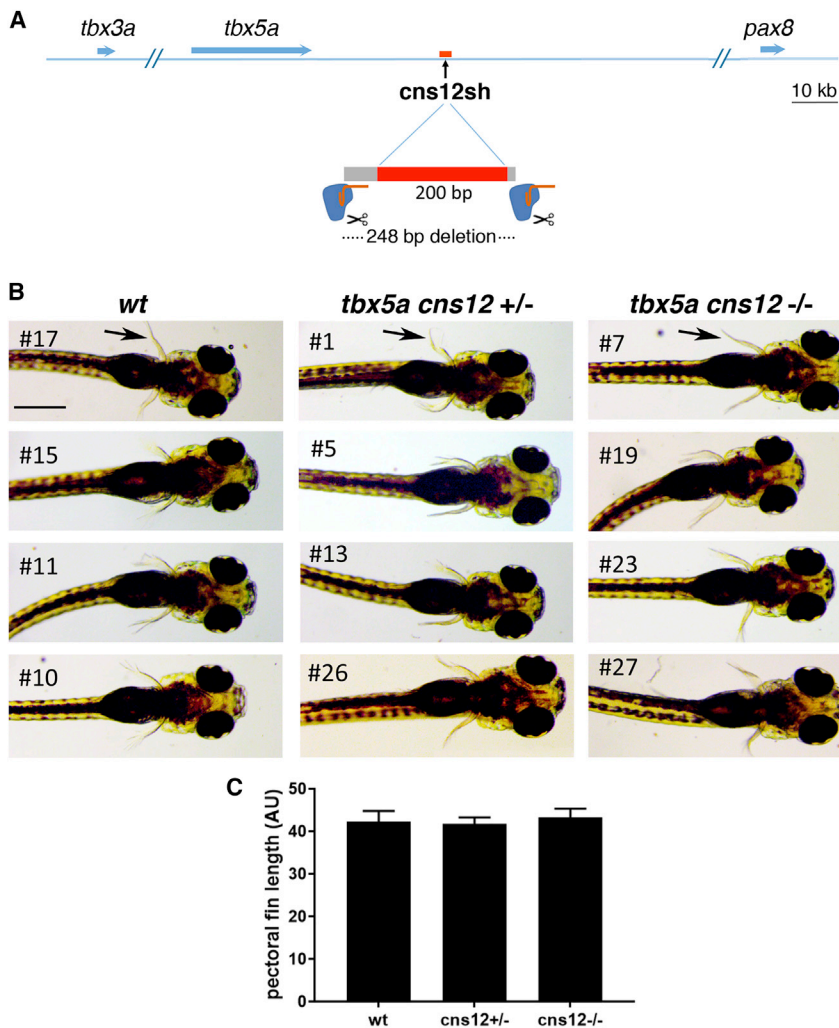

**Figure 4. Deletion of Zebrafish *tbx5a* *cns12sh* DNA Element**

(A) CRISPR/Cas9 gene editing strategy to delete the zebrafish *tbx5a* *cns12sh* element (Adachi et al., 2016). (B) Zebrafish 5-day-old embryos showing pectoral fins (arrows) in wild-type as well as heterozygous and homozygous *cns12sh* deletion mutants; scale bar: 1 mm (same for all panels).

(C) Comparison of pectoral fin lengths; data are expressed as mean  $\pm$  SD. For all comparisons,  $p > 0.05$  (not significant difference) using one-way ANOVA non-parametric test ( $n = 4$  biological replicates for each genotype, stage-matched). See also Figure S3.

downstream element, a mouse line homozygous for the intron 2 DNA element deletion was used to prepare fertilized oocytes that were then injected with sgRNAs for the *cns12* downstream element deletion. Mutant F0 adult mice were identified by DNA sequencing of PCR products overlapping the mutation from analysis of tail DNA. Further matings to wild-type mice generated F1 heterozygous mutants, and F1 matings generated F2 homozygous deletion mutants. Embryos at stages E9.5 and E14.5 were generated from timed matings of mice carrying heterozygous or homozygous deletion alleles; embryos were genotyped by PCR analysis of yolk sac DNA.

#### Generation of Mutant Zebrafish

CRISPR/Cas9 gene editing was performed in zebrafish as previously described (Gagnon et al., 2014; Irion et al., 2014), using EnGen Cas9 NLS protein from *S. pyogenes* (New England Biolabs) and two sgRNAs flanking the *tbx5a* *cns12sh* conserved DNA element (see Figure S3). Adult F0 fish were genotyped using PCR analysis and DNA sequencing of tail clips, and further matings of positive F0 fish generated F1 heterozygotes

and F2 homozygotes. Embryos (5 days old) were imaged and genotyped by PCR analysis of genomic DNA isolated from whole embryos.

#### PCR Primers for Genotyping of Mice and Zebrafish

Genotyping of mice carrying a deletion of the *Tbx5* intron 2 enhancer:

*Tbx5*-in2-Fwd 5'-TTCAGCTTGGAGTGAAGGGT-3'  
*Tbx5*-in2-Rev 5'-TCAGTGATGGGTCTTAGCGG-3'

Genotyping of mice carrying a deletion of the *Tbx5* *cns12sh* enhancer:

*Tbx5*-*cns12sh*-Fwd 5'-GTCCTCGGCACTACATACGA-3'  
*Tbx5*-*cns12sh*-WT-Rev 5'-CCCGGGGTCATCTGTTTTCA-3' (to detect wild-type)  
*Tbx5*-*cns12sh*-mut-Rev 5'-TGTAGCCTTGTTGGTCTGA-3' (to detect mutant).

Genotyping of zebrafish carrying a deletion of the *Tbx5* intron 2 enhancer:

*ztbx5a*-*cns12sh*-Fwd 5'-GCTCAGACAAATCCAAGCGT-3'  
*ztbx5a*-*cns12sh*-Rev 5'-TGTGAACAAAGTTTCGGTTGA-3'

#### Detection of mRNA and Limb Skeletal Elements

Detection of *Tbx5* and *Uncx* mRNAs was performed by whole-mount *in situ* hybridization as previously described (Sirbu and Duester, 2006). ImageJ

generate double knockouts in the case of redundancy. Validation of enhancers or silencers with *in vivo* knockout studies will allow the field of epigenetics to focus on changes observed in DNA elements that are necessary for gene regulation *in vivo*.

#### EXPERIMENTAL PROCEDURES

##### Animal Studies

All mouse and zebrafish studies conformed to the regulatory standards adopted by the Institutional Animal Care and Use Committee at the SBP Medical Discovery Institute, which approved this study under Animal Welfare Assurance Number A3053-01. Age and gender were not relevant for this study, as analysis was performed on embryos.

##### Generation of Mutant Mice

CRISPR/Cas9 gene editing was performed as previously described (Kumar et al., 2016), using two single-guide RNA (sgRNAs) flanking either the mouse *Tbx5* intron 2 DNA element or the downstream *cns12sh* DNA element in order to delete these elements (see Figures S1 and S2). Fertilized mouse oocytes injected with Cas9 mRNA and sgRNAs targeting either the *Tbx5* intron 2 DNA element (Minguilon et al., 2012) or the *Tbx5* *cns12* downstream element (Adachi et al., 2016) were allowed to proceed to birth to generate mouse lines. In order to generate double mutants carrying deletions of both the *Tbx5* intron 2 element and the *cns12*

software (<https://imagej.net/welcome>; Schneider et al., 2012) was used to quantitate forelimb *Tbx5* mRNA in photographs of E9.5 mouse embryos that were stage matched (embryos with 24 or 25 somites detected by *Uncx* expression), stained the same day for an equal length of time, and photographed at the same magnification; briefly, the ImageJ area selection tool was used to select regions of equal size in the forelimb domains of each embryo and then average pixel density was measured. Alcian blue and Alizarin red staining of cartilage and bone was performed as previously described (Rigueur and Lyons, 2014) to enable quantification of forelimb skeletal element length in E14.5 mouse embryos; skeletal element lengths were measured in photographs of forelimbs taken at the same magnification for all genotypes.

### Statistical Analysis

Statistical analysis was performed using one-way ANOVA (non-parametric test) to compare across all genotypes with data presented as mean  $\pm$  SD and with  $p > 0.05$  indicating non-significance.

### SUPPLEMENTAL INFORMATION

Supplemental Information includes three figures and can be found with this article online at <https://doi.org/10.1016/j.celrep.2018.05.052>.

### ACKNOWLEDGMENTS

We thank the Animal Resources Core Facility at SBP Medical Discovery Institute for conducting timed matings to generate mouse embryos and Judy Wade for help generating fertilized mouse oocytes from *Tbx5* intron 2 ( $\Delta$ 548) mutants to use for iterative CRISPR/Cas9 editing to also introduce the *cns12sh* mutation to produce double mutants. This work was funded by NIH grant R01 AR067731 (to G.D.).

### AUTHOR CONTRIBUTIONS

T.J.C. and G.D. designed the study, analyzed the data, and wrote the paper. T.J.C., J.J.L., and M.B. performed all the experiments. J.J.L. and P.D.S.D. provided zebrafish for the studies. All authors discussed the results and commented on the manuscript.

### DECLARATION OF INTERESTS

The authors declare no competing interests.

Received: March 24, 2018

Revised: May 2, 2018

Accepted: May 15, 2018

Published: June 12, 2018

### REFERENCES

- Adachi, N., Robinson, M., Goolsbee, A., and Shubin, N.H. (2016). Regulatory evolution of *Tbx5* and the origin of paired appendages. *Proc. Natl. Acad. Sci. USA* *113*, 10115–10120.
- Agarwal, P., Wylie, J.N., Galceran, J., Arkhitko, O., Li, C., Deng, C., Groschedl, R., and Bruneau, B.G. (2003). *Tbx5* is essential for forelimb bud initiation following patterning of the limb field in the mouse embryo. *Development* *130*, 623–633.
- Ahn, D.-G., Kourakis, M.J., Rohde, L.A., Silver, L.M., and Ho, R.K. (2002). T-box gene *tbx5* is essential for formation of the pectoral limb bud. *Nature* *417*, 754–758.
- Andrey, G., and Mundlos, S. (2017). The three-dimensional genome: regulating gene expression during pluripotency and development. *Development* *144*, 3646–3658.
- Bruneau, B.G., Nemer, G., Schmitt, J.P., Charron, F., Robitaille, L., Caron, S., Conner, D.A., Gessler, M., Nemer, M., Seidman, C.E., and Seidman, J.G. (2001). A murine model of Holt-Oram syndrome defines roles of the t-box transcription factor *Tbx5* in cardiogenesis and disease. *Cell* *106*, 709–721.
- Catarino, R.R., and Stark, A. (2018). Assessing sufficiency and necessity of enhancer activities for gene expression and the mechanisms of transcription activation. *Genes Dev.* *32*, 202–223.
- Cunningham, T.J., and Duester, G. (2015). Mechanisms of retinoic acid signaling and its roles in organ and limb development. *Nat. Rev. Mol. Cell Biol.* *16*, 110–123.
- Cunningham, T.J., Zhao, X., Sandell, L.L., Evans, S.M., Trainor, P.A., and Duester, G. (2013). Antagonism between retinoic acid and fibroblast growth factor signaling during limb development. *Cell Rep.* *3*, 1503–1511.
- Dickel, D.E., Ypsilanti, A.R., Pla, R., Zhu, Y., Barozzi, I., Mannion, B.J., Khin, Y.S., Fukuda-Yuzawa, Y., Plajzer-Frick, I., Pickle, C.S., et al. (2018). Ultra-conserved Enhancers Are Required for Normal Development. *Cell* *172*, 491–499.e15.
- Dupé, V., Davenne, M., Brocard, J., Dollé, P., Mark, M., Dierich, A., Chambon, P., and Rijli, F.M. (1997). In vivo functional analysis of the *Hoxa-1 3'* retinoic acid response element (3'RARE). *Development* *124*, 399–410.
- Gagnon, J.A., Valen, E., Thyme, S.B., Huang, P., Akhmetova, L., Pauli, A., Montague, T.G., Zimmerman, S., Richter, C., and Schier, A.F. (2014). Efficient mutagenesis by Cas9 protein-mediated oligonucleotide insertion and large-scale assessment of single-guide RNAs. *PLoS ONE* *9*, e98186.
- Houle, M., Sylvestre, J.R., and Lohnes, D. (2003). Retinoic acid regulates a subset of *Cdx1* function in vivo. *Development* *130*, 6555–6567.
- Irlon, U., Krauss, J., and Nüsslein-Volhard, C. (2014). Precise and efficient genome editing in zebrafish using the CRISPR/Cas9 system. *Development* *141*, 4827–4830.
- Kumar, S., Cunningham, T.J., and Duester, G. (2016). Nuclear receptor corepressors *Ncor1* and *Ncor2* (*Smrt*) are required for retinoic acid-dependent repression of *Fgf8* during somitogenesis. *Dev. Biol.* *418*, 204–215.
- Minguillon, C., Nishimoto, S., Wood, S., Vendrell, E., Gibson-Brown, J.J., and Logan, M.P. (2012). Hox genes regulate the onset of *Tbx5* expression in the forelimb. *Development* *139*, 3180–3188.
- Nishimoto, S., Minguillon, C., Wood, S., and Logan, M.P. (2014). A combination of activation and repression by a colinear Hox code controls forelimb-restricted expression of *Tbx5* and reveals Hox protein specificity. *PLoS Genet.* *10*, e1004245.
- Nishimoto, S., Wilde, S.M., Wood, S., and Logan, M.P. (2015). RA Acts in a Coherent Feed-Forward Mechanism with *Tbx5* to Control Limb Bud Induction and Initiation. *Cell Rep.* *12*, 879–891.
- Osterwalder, M., Barozzi, I., Tissières, V., Fukuda-Yuzawa, Y., Mannion, B.J., Afzal, S.Y., Lee, E.A., Zhu, Y., Plajzer-Frick, I., Pickle, C.S., et al. (2018). Enhancer redundancy provides phenotypic robustness in mammalian development. *Nature* *554*, 239–243.
- Rallis, C., Bruneau, B.G., Del Buono, J., Seidman, C.E., Seidman, J.G., Nissim, S., Tabin, C.J., and Logan, M.P.O. (2003). *Tbx5* is required for forelimb bud formation and continued outgrowth. *Development* *130*, 2741–2751.
- Rigueur, D., and Lyons, K.M. (2014). Whole-mount skeletal staining. *Methods Mol. Biol.* *1130*, 113–121.
- Schneider, C.A., Rasband, W.S., and Eliceiri, K.W. (2012). NIH Image to ImageJ: 25 years of image analysis. *Nat. Methods* *9*, 671–675.
- Sirbu, I.O., and Duester, G. (2006). Retinoic-acid signalling in node ectoderm and posterior neural plate directs left-right patterning of somitic mesoderm. *Nat. Cell Biol.* *8*, 271–277.
- Smith, E., and Shilatifard, A. (2014). Enhancer biology and enhanceropathies. *Nat. Struct. Mol. Biol.* *21*, 210–219.
- Will, A.J., Cova, G., Osterwalder, M., Chan, W.L., Wittler, L., Brieske, N., Heinrich, V., de Villartay, J.P., Vingron, M., Klopocki, E., et al. (2017). Composition and dosage of a multipartite enhancer cluster control developmental expression of *Ihh* (Indian hedgehog). *Nat. Genet.* *49*, 1539–1545.

Cell Reports, Volume 23

## Supplemental Information

### **Genomic Knockout of Two Presumed Forelimb *Tbx5* Enhancers Reveals They Are Nonessential for Limb Development**

**Thomas J. Cunningham, Joseph J. Lancman, Marie Berenguer, P. Duc Si Dong, and Gregg Duester**



## Supplemental Figures and Legends

### Mouse *Tbx5* intron 2 gene edited allele (357 bp deletion):

KEY: **EXONS (BOLD)**  
INTRONS (NORMAL TYPE)  
N<sub>20</sub> (sgRNA) NGG (PAM)  
REPORTED: HOX BINDING SITES, RARE, Tcf/Lef (Wnt/ $\beta$ -catenin)  
**GENOTYPING PRIMERS**  
DELETED REGION (357 bp)

mm10: chr5:119836798-119838792 *Tbx5*-intron2- $\Delta$ 357

```
CTTCAGCTTGGAGTGAAGGGTCAAACAGCTTGTCCCCTATGTCGCTAGACACTCTCCAACCTCCCTCTCTTGTCTCAGAAATAGAACCTCGCGCGGGCACAGGAAC
CCCTGCGCACCATGGCCGATACAGATGAGGGCTTTGGCCCTGGCGCGCAGCCCTCTGGAGCCTGATTCCAAAGACAGGTCCTTGGGATTCGAAACCTGAGAGTGCTC
TGGGGGCTCCAGCAAGTCTCCATCATCCCGCAGGCTGCCTTCACCCAGCAGGTAAAGAAAAGCCGGCCAGCGGCAGGCGTAGACCGAGGACTGAGCCCAGCTC
TCTGCTAACGGTGCAGGGGGTGGGCAGGGCCAGCTATTCCTCTATTTCTGGCTAGTCTCACCAAATCTCCCCAATTCCACTCTATCCCAATCCACTTTATC
GAGGCGTTTATCTTTATGGCCTCGCTATTTTAGAAACCTATTACATTATTGGAGAGCTCTCAATTATTCCGACTATTTGGGGTCAGCTAACCAACGGGCCAGATAA
TTCTCTCCCAGCTGCCCTGGGTATGCCTTATTAAGGGTCCGGTTCAGCGGCCCTTCAGGCGGGCATGAGCGATGACTTGACCCTCCTTAGATCTTTCTTAGCCTT
CGCCTCGGCTCGCCTGCTCTGCGCAACCCGCTCGCCCCCTCATAACAGTACCATTTATCTTGTCTCGGGGCCTGGAGGAGCTCCCTGACCCGCGGAGGAGAGCACA
CAGGGGCTGGAACCAAGGCACCCAGAGCCCGCTGACTGGAAGTTGGTCCGGAGTGGAGGGAGAGGTCTTGTGGTCTGTTATTTGAGTGGCCCATCGTTTTTTGGG
GGCGCTAAGTAGGTTTAAACTAGGTGTCACTGGGAAGGCTTGACCAGAGAGATGAGTTTGATCTAGAAATCTTGTCCAATGATGTGTGTATAGCTTTTTAATAA
AAGCAAAGAGGCTTAAGAATAGTTTGGGAAATTTACATAACATTTTGAAGGGGAAAACAAGTTCACTTTTTAGTCGGTGGTGGATAATGTTTACAAATGAAG
AGTAGTGTCTGACTGTTTGGTATTGGTTTTAGAAATAACTTCCAGTGGAAAGAGAAAATGTTAAAGGCTTAATTGGTTGCCCAAGTCAAAGAAAGGCTGGG
CGGTGGCTAGATAAGGCAAGAGTCTGGAAAGATTGTTAATATAGACACTGAGGGGAAAACACTTTTTTTGGTCTTGAGAAGAAAACGATTTTAAATTTG
AAAATTTCTACATAGTGGCTCACATGTGTTGGAATCTTAGCACTTAGGAGGGTGGAGCAGGAGGGTTGCCAAGAGTTTGGACCACTTTTATGCGCTGCATAGTG
AATTCAGGCCCTGTCTGGGCTGCAGAGCAAGACTTTGTCTCCAATATTAATAACAACAATAATATTGAAAATTTTTGTATGTTTATAGACCCAGTGTATGAC
GGACAGCGATGATTTGCATAGCTGTGTGTTTGCATCTGGGTGACAATACAAAATATCTTAGTGGGGTTTTCTAGATGGATCCCTCCCAATCATGTTTCAGC
TAAAAATGGATCCAAATTAGATGGCCTGGTCTCTAGGGGGGAGCTCTGTGGAGGGGAATAATCCCAGGCCCAATCTGGTGGAAAGAGACAGCAGGTACTAAGG
ACTGAGATGCTGCTGGACGCAAGCTCCAACTACCTAGGGAGCTGTAGGCAGATGCCATGGGTCGCCCTAGACTTTCCATCACTCCCAGAAAGTCAGAGCGCTCT
TTCTTTAACCACAGACTTTGGTAGGTACTTTGGCCTCTGCATATAGGGGGGAGTTTGGAAAAGGATTCCCCGCTAAGACCCATCACTGAAAATTTTCTCTTTGT
CTATCAAGGGCATGGAAGGAATCAAGGTGTTTCTTCATGAACGTGAACTGTGGCTGAAGTTCCACGAAGTGGGCACAGAGATGATCATCCAAGGCAGGGAGGT
```

### Mouse *Tbx5* intron 2 gene edited allele (548 bp deletion):

KEY: **EXONS (BOLD)**  
INTRONS (NORMAL TYPE)  
N<sub>20</sub> (sgRNA) NGG (PAM)  
REPORTED: HOX BINDING SITES, RARE, Tcf/Lef (Wnt/ $\beta$ -catenin)  
**GENOTYPING PRIMERS**  
DELETED REGION (548 bp)

mm10: chr5:119836798-119838792 *Tbx5*-intron2- $\Delta$ 548

```
CTTCAGCTTGGAGTGAAGGGTCAAACAGCTTGTCCCCTATGTCGCTAGACACTCTCCAACCTCCCTCTCTTGTCTCAGAAATAGAACCTCGCGCGGGCACAGGAAC
CCCTGCGCACCATGGCCGATACAGATGAGGGCTTTGGCCCTGGCGCGCAGCCCTCTGGAGCCTGATTCCAAAGACAGGTCCTTGGGATTCGAAACCTGAGAGTGCTC
TGGGGGCTCCAGCAAGTCTCCATCATCCCGCAGGCTGCCTTCACCCAGCAGGTAAAGAAAAGCCGGCCAGCGGCAGGCGTAGACCGAGGACTGAGCCCAGCTC
TCTGCTAACGGTGCAGGGGGTGGGCAGGGCCAGCTATTCCTCTATTTCTGGCTAGTCTCACCAAATCTCCCCAATTCCACTCTATCCCAATCCACTTTATC
GAGGCGTTTATCTTTATGGCCTCGCTATTTTAGAAACCTATTACATTATTGGAGAGCTCTCAATTATTCCGACTATTTGGGGTCAGCTAACCAACGGGCCAGATAA
TTCTCTCCCAGCTGCCCTGGGTATGCCTTATTAAGGGTCCGGTTCAGCGGCCCTTCAGGCGGGCATGAGCGATGACTTGACCCTCCTTAGATCTTTCTTAGCCTT
CGCCTCGGCTCGCCTGCTCTGCGCAACCCGCTCGCCCCCTCATAACAGTACCATTTATCTTGTCTCGGGGCCTGGAGGAGCTCCCTGACCCGCGGAGGAGAGCACA
CAGGGGCTGGAACCAAGGCACCCAGAGCCCGCTGACTGGAAGTTGGTCCGGAGTGGAGGGAGAGGTCTTGTGGTCTGTTATTTGAGTGGCCCATCGTTTTTTGGG
GGCGCTAAGTAGGTTTAAACTAGGTGTCACTGGGAAGGCTTGACCAGAGAGATGAGTTTGATCTAGAAATCTTGTCCAATGATGTGTGTATAGCTTTTTAATAA
AAGCAAAGAGGCTTAAGAATAGTTTGGGAAATTTACATAACATTTTGAAGGGGAAAACAAGTTCACTTTTTAGTCGGTGGTGGATAATGTTTACAAATGAAG
AGTAGTGTCTGACTGTTTGGTATTGGTTTTAGAAATAACTTCCAGTGGAAAGAGAAAATGTTAAAGGCTTAATTGGTTGCCCAAGTCAAAGAAAGGCTGGG
CGTGGTGTCTAGATAAGGCAAGAGTCTGGAAAGATTGTTAATATAGACACTGAGGGGAAAACACTTTTTTTGGTCTTGAGAAGAAAACGATTTTAAATTTG
AAAATTTCTACATAGTGGCTCACATGTGTTGGAATCTTAGCACTTAGGAGGGTGGAGCAGGAGGGTTGCCAAGAGTTTGGACCACTTTTATGCGCTGCATAGTG
AATTCAGGCCCTGTCTGGGCTGCAGAGCAAGACTTTGTCTCCAATATTAATAACAACAATAATATTGAAAATTTTTGTATGTTTATAGACCCAGTGTATGAC
GGACAGCGATGATTTGCATAGCTGTGTGTTTGCATCTGGGTGACAATACAAAATATCTTAGTGGGGTTTTCTAGATGGATCCCTCCCAATCATGTTTCAGC
TAAAAATGGATCCAAATTAGATGGCCTGGTCTCTAGGGGGGAGCTCTGTGGAGGGGAATAATCCCAGGCCCAATCTGGTGGAAAGAGACAGCAGGTACTAAGG
ACTGAGATGCTGCTGGACGCAAGCTCCAACTACCTAGGGAGCTGTAGGCAGATGCCATGGGTCGCCCTAGACTTTCCATCACTCCCAGAAAGTCAGAGCGCTCT
TTCTTTAACCACAGACTTTGGTAGGTACTTTGGCCTCTGCATATAGGGGGGAGTTTGGAAAAGGATTCCCCGCTAAGACCCATCACTGAAAATTTTCTCTTTGT
CTATCAAGGGCATGGAAGGAATCAAGGTGTTTCTTCATGAACGTGAACTGTGGCTGAAGTTCCACGAAGTGGGCACAGAGATGATCATCCAAGGCAGGGAGGT
```

**Figure S1. CRISPR/Cas9 gene editing of mouse *Tbx5* intron 2 element. Related to Figure 1.** Shown is the DNA sequence in the vicinity of the mouse *Tbx5* intron 2 DNA element conserved in mammals (Minguillon et al., 2012). Within the intron 2 DNA element are shown regions that were reported to bind HOX4 or HOX5 proteins (orange), a retinoic acid response element (red), and a Tcf/Lef (Wnt/ $\beta$ -catenin) element (green) (Minguillon et al., 2012; Nishimoto et al., 2014; Nishimoto et al., 2015). The locations of sgRNAs used for CRISPR/Cas9 gene editing are shown, resulting in mice carrying the deletions shown by gray shading.



## Zebrafish *tbx5a* cns12sh DNA element gene edited allele (248 bp deletion):

KEY: NON-CODING (all)

N<sub>20</sub> (sgRNA) NGG (PAM)

CNS12sh DNA element

GENOTYPING PRIMERS

DELETED REGION (248 bp)

```
CCTCAGACAAATCCAAGCGTGGCGGCAGGATAAGGCCATGGAAAGATCTCTTTTATCTCCTCGGCACTTTTGCCTTTTG
TTGATGATACACTGACCTTCTCATCGATCTCCAGCTCTAAGCTCCTGTGCGCTCTGATAATGAGACTCCGCTGATAATG
AGGAAAATAATTGTCCCGGCGGTGTGTTGTGGCTGTCCGGCGGCATCTGACCCGCATTGTCTGCACACATCTTGATTI
CATTAAACATCTCTTCTTCTACTGGCTGTCAAAAGACTCTTGTCTGCTGGAGTGATCCACCATGACTGTCTAGTGGC
CTTCTAAAGGGGATCTACTATGCAGGAACCGCTTTATAAGGGGTGGCATGGTGGCGCAGTGGGTAGCACAATCATCT
TACAGCGAGAAGGTCAACCCGGCTGGTTCAGGTGACATTCTGTGTGGAGTTGCATGTTCTCCTAGTGTGTGCATGG
GTTTCTCCATCAAAAAACATGTGGTATAGGGGAATTGGGTAAGCTAAATTGTTGGTAGTGTGTATGGATGTTTCCAG
TGATGGGTTGCAGCTGGAAGGGCATTGCTGCATTGAAAAATATGCTGGATAAGTTGGCGGTTTATTCCACTGTGGA
AACCCAGATTAATAAAGGAACTAAGCTGAAAATTAATGAATGAATGATCAGACTTGATGAATGAAACACTTTGCTTGA
CATTCCCTCTTGAACGTGCCACGCCAACACGAGGAGAACATGCAAACCCACAGAAACACCAAATGACCCAGCCGGG
ACTCAAACCAGCAACCTTCTGTGTGAGGTGATCGTGCTACCCACTGCACCACCGTGACGCTTTCACGAGATGTTTTI
CAACCGAAAACTTTGTTCA
```

**Figure S3. CRISPR/Cas9 gene editing of zebrafish *tbx5a* DNA element. Related to Figure 4.** Shown is the DNA sequence in the vicinity of the zebrafish cns12sh DNA element located ~30 kb downstream of the *tbx5a* coding region, showing a 248 bp region deleted using CRISPR/Cas9 gene editing. Bold sequence refers to the region highly conserved in jawed vertebrates (Adachi et al., 2016).

## Supplemental References

- Adachi, N., Robinson, M., Goolsbee, A., and Shubin, N.H. (2016). Regulatory evolution of Tbx5 and the origin of paired appendages. *Proc Natl Acad Sci USA* *113*, 10115-10120.
- Minguillon, C., Nishimoto, S., Wood, S., Vendrell, E., Gibson-Brown, J.J., and Logan, M.P. (2012). Hox genes regulate the onset of Tbx5 expression in the forelimb. *Development* *139*, 3180-3188.
- Nishimoto, S., Minguillon, C., Wood, S., and Logan, M.P. (2014). A combination of activation and repression by a colinear Hox code controls forelimb-restricted expression of Tbx5 and reveals Hox protein specificity. *PLoS Genetics* *10*, e1004245.
- Nishimoto, S., Wilde, S.M., Wood, S., and Logan, M.P. (2015). RA Acts in a Coherent Feed-Forward Mechanism with Tbx5 to Control Limb Bud Induction and Initiation. *Cell Reports* *12*, 879-891.
